# Supplementary material
Source: PubMed Central journal article supplement (PMC4911871)
Supplement: jcav07p1049s1.pdf [file jcav07p1049s1.pdf]

## Supplementary table

**Table S1:**

Relationships between different CDK5 and p27 protein expression status in gastric cancer tissues and various clinicopathological variables

| Variables                         | Total | CDK5 and p27<br>low expression<br>n | CDK5 and/or p27<br>high expression<br>n | $\chi^2$ | P      |
|-----------------------------------|-------|-------------------------------------|-----------------------------------------|----------|--------|
| <b>Gender</b>                     |       |                                     |                                         |          |        |
| Male                              | 180   | 44                                  | 136                                     | 4.974    | 0.026* |
| Female                            | 64    | 25                                  | 39                                      |          |        |
| <b>Age at surgery(years)</b>      |       |                                     |                                         |          |        |
| ≤60                               | 124   | 35                                  | 89                                      | 0.000    | 0.985  |
| >60                               | 120   | 34                                  | 86                                      |          |        |
| <b>Size of primary tumor (cm)</b> |       |                                     |                                         |          |        |
| ≤5                                | 100   | 23                                  | 77                                      | 2.328    | 0.127  |
| >5                                | 144   | 46                                  | 98                                      |          |        |
| <b>Location of primary tumor</b>  |       |                                     |                                         |          |        |
| Lower 1/3                         | 57    | 16                                  | 41                                      | 1.952    | 0.582  |
| Middle 1/3                        | 61    | 16                                  | 45                                      |          |        |
| Upper 1/3                         | 104   | 28                                  | 76                                      |          |        |
| More than 1/3                     | 22    | 9                                   | 13                                      |          |        |
| <b>Borrmann type</b>              |       |                                     |                                         |          |        |
| early stage                       | 10    | 3                                   | 7                                       | 0.521    | 0.770  |
| I+ II type                        | 90    | 23                                  | 67                                      |          |        |
| III+IV type                       | 144   | 43                                  | 101                                     |          |        |
| <b>Degree of differentiation</b>  |       |                                     |                                         |          |        |
| Well/moderate                     | 96    | 21                                  | 75                                      | 3.200    | 0.074  |
| Poor and not                      | 148   | 48                                  | 100                                     |          |        |
| <b>Lauren's classification</b>    |       |                                     |                                         |          |        |
| Intestinal type                   | 196   | 49                                  | 147                                     | 5.281    | 0.022* |
| Diffuse type                      | 48    | 20                                  | 28                                      |          |        |
| <b>Histological type</b>          |       |                                     |                                         |          |        |
| Papillary                         | 7     | 2                                   | 5                                       | 5.373    | 0.146  |
| Tubular                           | 189   | 47                                  | 142                                     |          |        |
| Mucinous                          | 20    | 8                                   | 12                                      |          |        |
| Signet-ring cell                  | 28    | 12                                  | 16                                      |          |        |
| <b>Depth of invasion</b>          |       |                                     |                                         |          |        |
| T1                                | 41    | 11                                  | 30                                      | 3.257    | 0.354  |
| T2                                | 27    | 5                                   | 22                                      |          |        |
| T3                                | 62    | 15                                  | 47                                      |          |        |

|                              |     |    |     |       |        |
|------------------------------|-----|----|-----|-------|--------|
| T4                           | 114 | 38 | 76  |       |        |
| <b>Lymph node metastasis</b> |     |    |     |       |        |
| N0                           | 64  | 15 | 49  |       |        |
| N1                           | 42  | 6  | 36  | 9.128 | 0.028* |
| N2                           | 43  | 12 | 31  |       |        |
| N3                           | 95  | 36 | 59  |       |        |
| <b>TNM stage</b>             |     |    |     |       |        |
| I                            | 45  | 12 | 33  |       |        |
| II                           | 55  | 9  | 46  | 5.722 | 0.126  |
| III                          | 126 | 42 | 84  |       |        |
| IV                           | 18  | 6  | 12  |       |        |
| <b>Vessel invasion</b>       |     |    |     |       |        |
| Negative                     | 234 | 67 | 167 |       |        |
| Positive                     | 10  | 2  | 8   |       | 0.729  |
| <b>Distant metastasis</b>    |     |    |     |       |        |
| Negative                     | 226 | 63 | 163 | 0.245 | 0.596  |
| Positive                     | 18  | 6  | 12  |       |        |

\* $P < 0.05$ : statistical significance.

**Table S1:** Relationships between different CDK5 and p27 protein expression status in gastric cancer tissues and various clinicopathological variables
